# Supplementary material for: Structure and Mechanical Properties of iPP-Based Nanocomposites Crystallized under High Pressure
Source: MDPI journal article supplement (doi:10.3390/nano14070629), 2024-04-04
Supplement: s1 [file s1]

## Supplementary Materials

# Structure and Mechanical Properties of iPP-Based Nanocomposites Crystallized under High Pressure

Sivanjineyulu Veluri, Przemysław Sowinski, Mariia Svyntkivska, Zbigniew Bartczak, Tomasz Makowski and Ewa Piorkowska \*

Centre of Molecular and Macromolecular Studies, Polish Academy of Sciences,  
Sienkiewicza 112, 90 363 Lodz

\* Correspondence: ewa.piorkowska@cbmm.lodz.pl; Tel.: +48-42-6803-316

Table S1. Characteristics of iPP and its nanocomposites, PP/CN and PP/MT5, crystallized under pressure of 1.4 MPa, 200 MPa, and 300 MPa:  $X_c$  – crystallinity determined by WAXS,  $L_p$  – average long period determined by SAXS,  $L_{cx}$  – average lamella thickness based on  $X_c$  and  $L_p$ ,  $L_{av}$  – average lamella thickness, calculated based on eqs. (3),(5) and (6), according to [48]. (i) denotes materials crystallized isothermally, asterisks mark values based on FS-DSC thermograms.

| Sample code | Pressure (MPa) | $X_c$ (%) | $L_p$ (nm) | $L_{cx}$ (nm) | $L_{av}$ (nm) |
|-------------|----------------|-----------|------------|---------------|---------------|
| iPP         | 1.4            | 57        | 18.2       | 10.0          | 10.3, 9.3*    |
| PP/CN1      |                | 61        | 19.4       | 11.4          | 10.1          |
| PP/CN3      |                | 60        | -          | -             | 10.5          |
| PP/CN5      |                | 59        | -          | -             | 9.7           |
| PP/MT5      |                | 57        | 18.2       | 10.0          | 9.3           |
| iPP         | 200            | 61        | 12.9       | 7.6           | 8.1, 7.5*     |
| PP/CN1      |                | 61        | 13.9       | 8.2           | 8.4           |
| PP/CN3      |                | 62        | -          | -             | 8.3           |
| PP/CN5      |                | 63        | -          | -             | 8.3, 8.6*     |
| PP/MT5      |                | 53        | 11.6       | 5.9           | 8.2           |
| iPP         | 300            | 62        | 12.3       | 7.4           | 8.1, 7.0*     |
| PP/CN1      |                | 62        | 12.7       | 7.6           | 7.9           |
| PP/CN3      |                | 63        | -          | -             | 8.2           |
| PP/CN5      |                | 65        | -          | -             | 7.9, 6.6*     |
| PP/MT5      |                | 57        | 11.5       | 6.3           | 7.9           |
| iPP(i)      | 200            | 70        | 16.9       | 11.5          | 10.2          |
| PP/CN5(i)   |                | 71        | -          | -             | 10.6          |
| iPP(i)      | 300            | 69        | 16.0       | 10.7          | 9.7           |
| PP/CN5(i)   |                | 71        | -          | -             | 9.9           |

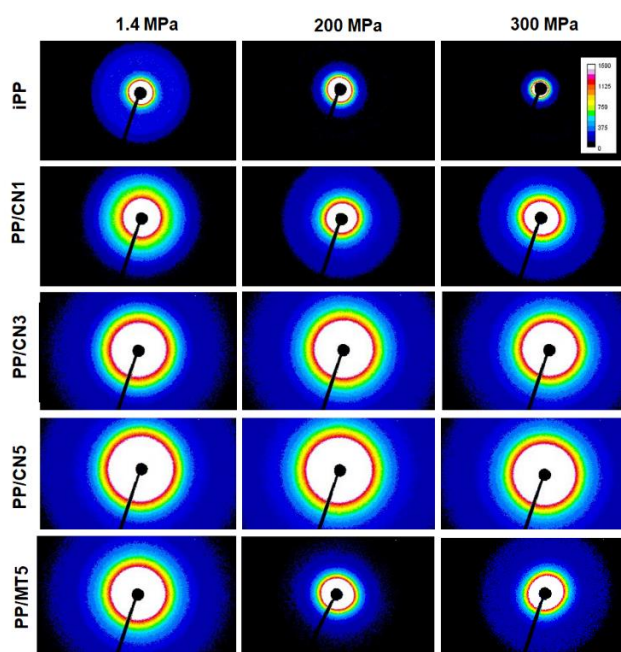

Figure S1a. SAXS patterns of iPP, PP/CN1, PP/CN3, PP/CN5 and PP/MT5 crystallized nonisothermally under 1.4 MPa, 200 MPa, and 300 MPa.

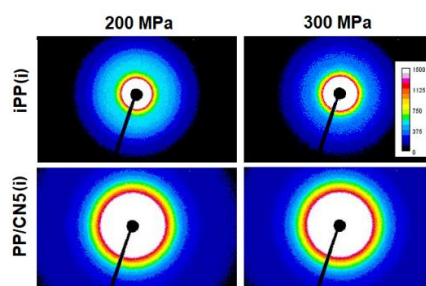

Figure S1b. SAXS patterns of iPP and PP/CN5 crystallized isothermally, as denoted by (i), under 200 MPa and 300 MPa.

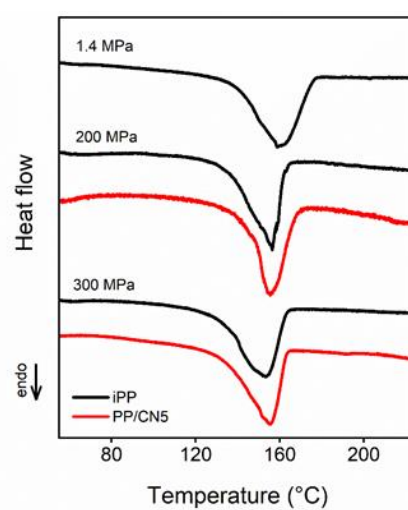

Figure S2. FS-DSC heating thermograms of iPP and PP/CN5 crystallized nonisothermally under 1.4 MPa, 200 MPa and 300 MPa. Heating rate of 5000 °C/min.

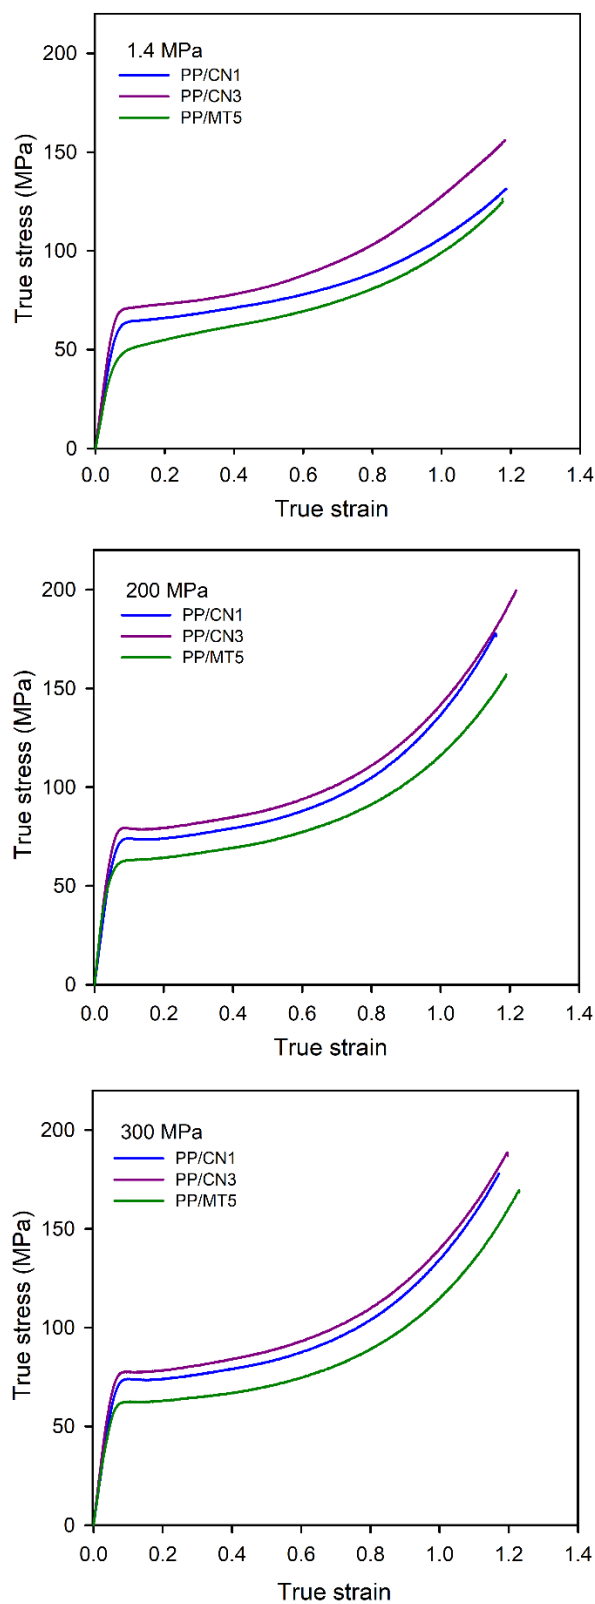

Figure S3. True stress-true strain dependencies of PP/CN1, PP/CN3 and PP/MT5 crystallized nonisothermally under 1.4 MPa, 200 MPa, and 300 MPa.

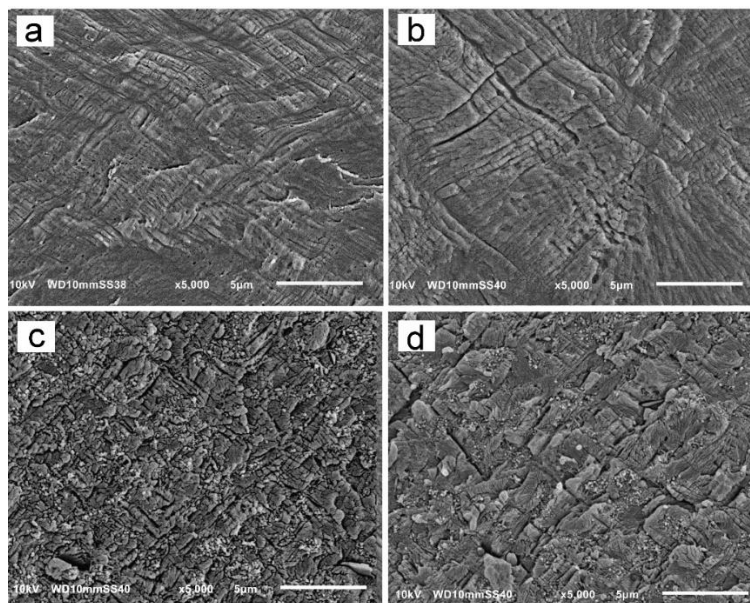

Figure S4. SEM micrographs of iPP and PP/CN5 crystallized nonisothermally under 200 MPa and 300 MPa, and compressed to true strain of 0.4: iPP, 200 MPa (a), iPP, 300 MPa (b), PP/CN5, 200 MPa (c), PP/CN5, 300 MPa (d). LD vertical.
